# Supplementary material for: Synthesis of aryl anilinomaleimide based derivatives as glycogen synthase kinase-3β inhibitors with potential role as antidepressant agents
Source: Royal Society of Chemistry journal article supplement (doi:10.1039/c5nj02896e), 2016-01-01
Supplement: c5nj02896e1.pdf [file c5nj02896e1.pdf]

## Supplementary Information

### **Synthesis of Aryl anilinoimide based derivatives as glycogen synthase kinase-3 $\beta$ inhibitors with potential role as antidepressant agents**

Mushtaq A Tantray<sup>a</sup>, Imran Khan<sup>a</sup>, Hinna Hamid<sup>a\*</sup>, Mohammad Sarwar Alam<sup>a</sup>, Abhijeet Dhulap<sup>b</sup>, Abul Kalam<sup>c</sup>

<sup>a</sup>*Department of Chemistry, Faculty of Science, Jamia Hamdard (Hamdard University), New Delhi 110062, India.*

<sup>b</sup>*CSIR- Unit for Research and Development of Information Products (URDIP), Pune 411038, India*

<sup>c</sup>*Department of Pharmacology, Faculty of Pharmacy, Jamia Hamdard (Hamdard University), New Delhi 110062, India.*

Correspondence to Dr. Hinna Hamid, Jamia Hamdard (Hamdard University) Hamdard Nagar, New Delhi 110062, Email ID. [hhamid@jamiyahamdard.ac.in](mailto:hhamid@jamiyahamdard.ac.in). Phone: +91 11 26059688 (5559).

Submitted to: New Journal of Chemistry

## Spectral characterization of representative compounds:

### 4-(2,5-dihydro-1-methyl-2,5-dioxo-4-phenyl-1H-pyrrol-3-ylamino)-N-(4-fluorophenyl)benzamide (7c)

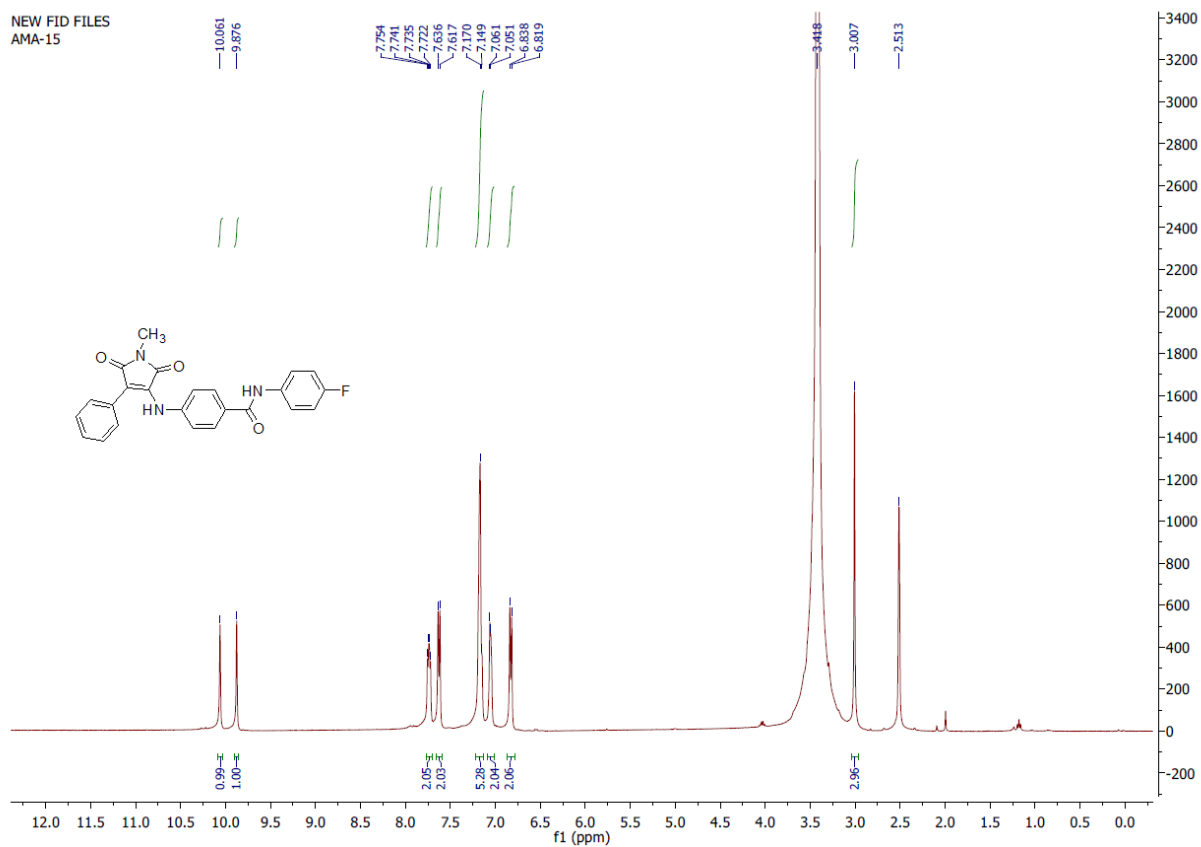

Proton NMR (7c)

AMA-15

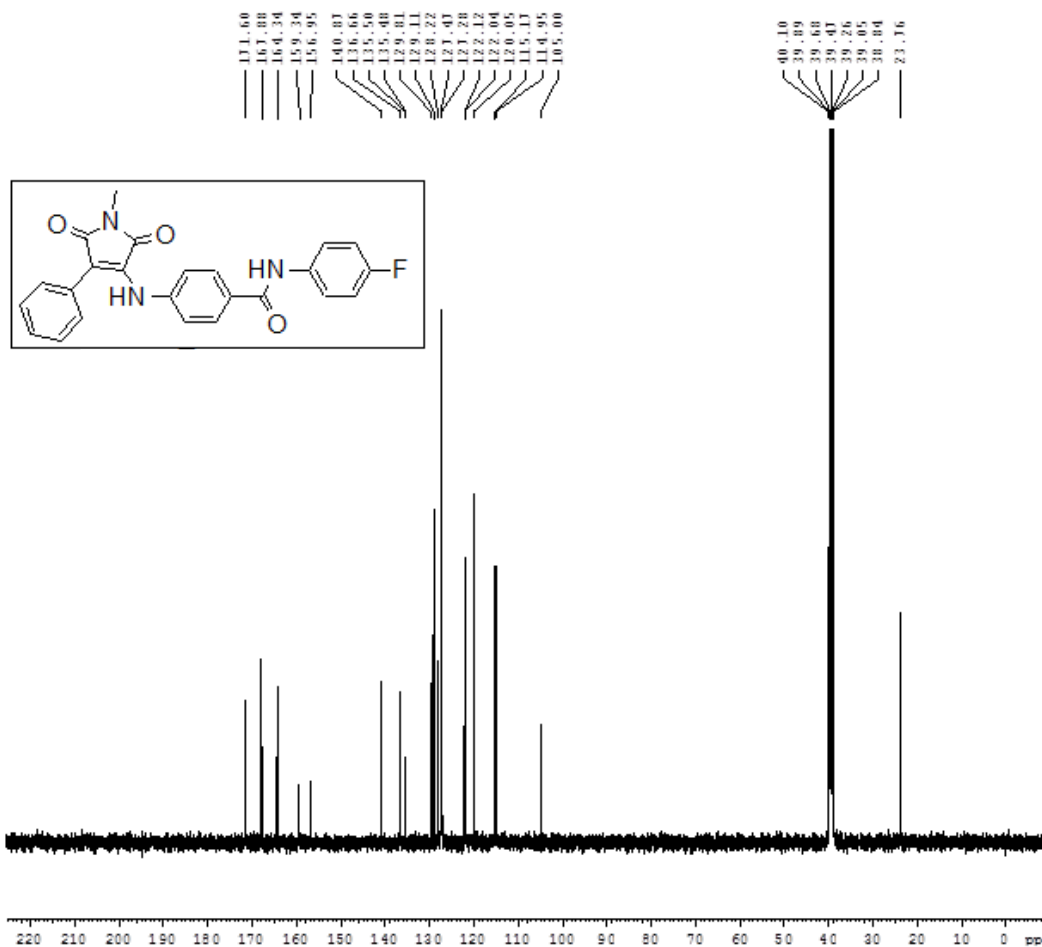

BRUKER  
AVANCE II 400 NMR  
Spectrometer  
SAIF  
Panjab University  
Chandigarh

Current Data Parameters  
NAME Nov13-2014  
EXPNO 560  
PROCNO 1

F2 - Acquisition Parameters  
Date\_ 20141114  
Time 14.10  
INSTRUM spect  
PROBHD 5 mm PABBO BB-  
PULPROG zgpg30  
TD 65536  
SOLVENT DMSO  
NS 512  
DS 4  
SWH 29761.904 Hz  
FIDRES 0.454131 Hz  
AQ 1.1010548 sec  
RG 2050  
DW 16.800 usec  
DE 6.00 usec  
TE 295.5 K  
D1 2.00000000 sec  
d11 0.03000000 sec  
DELTA 1.89999998 sec  
TDO 1

==== CHANNEL f1 =====  
NUC1 13C  
P1 9.60 usec  
PL1 -2.00 dB  
SFO1 100.6228298 MHz

==== CHANNEL f2 =====  
CPDPRG2 waltz16  
NUC2 1H  
PCPD2 80.00 usec  
PL2 -3.00 dB  
PL12 14.31 dB  
PL13 18.00 dB  
SFO2 400.1216005 MHz

F2 - Processing parameters  
SI 32768  
SF 100.6128193 MHz  
WDW EM  
SSB 0  
LB 1.00 Hz  
GB 0  
PC 1.40

avtar saifpu@yahoo.co.in

C-13 NMR (7c)

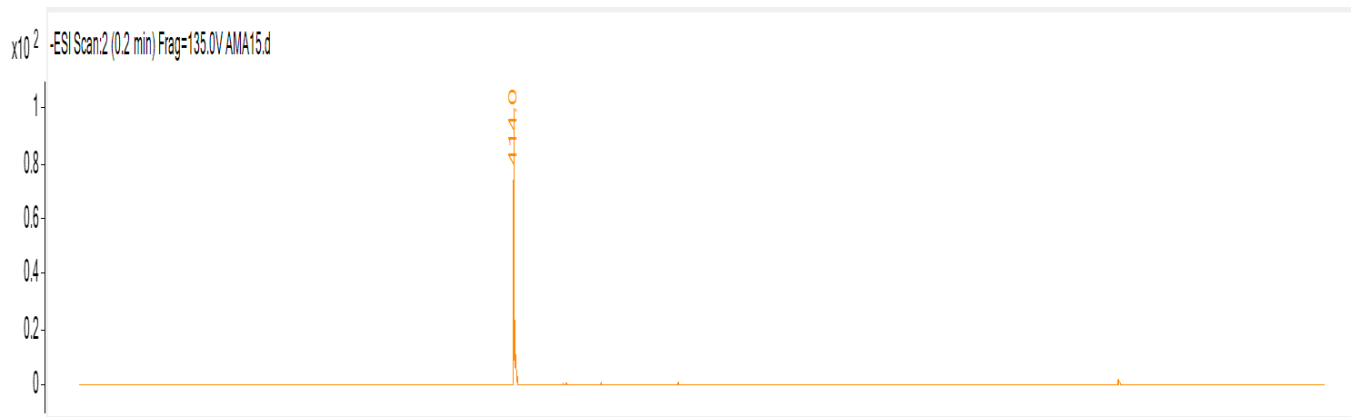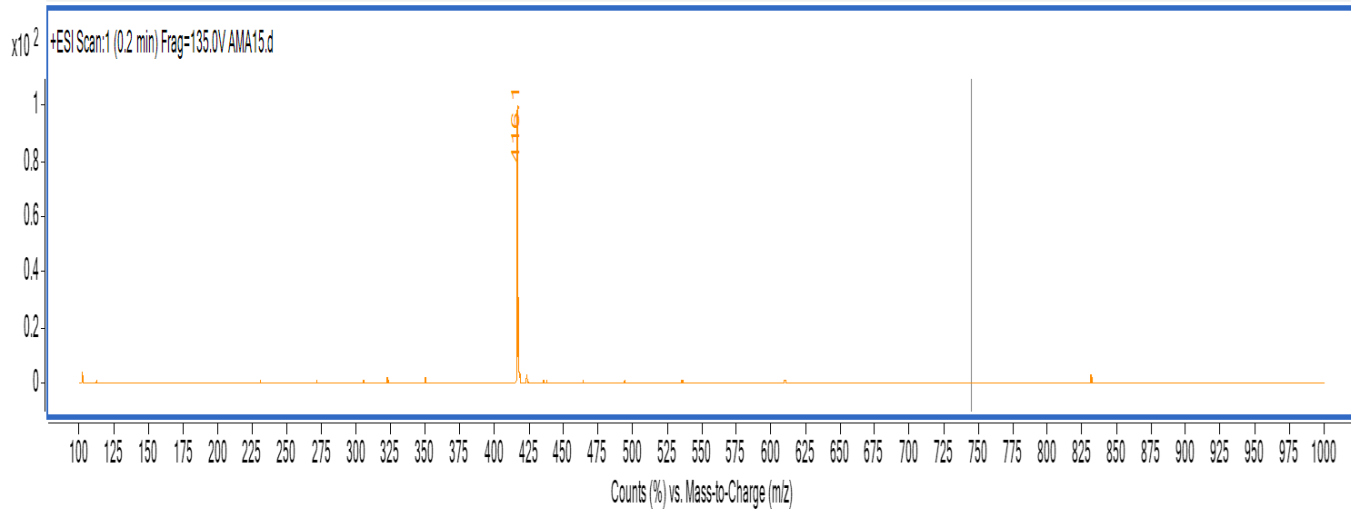

**ESI-MS (7c)**

**4-(4-(4-chlorophenyl)-2,5-dihydro-2,5-dioxo-1H-pyrrol-3-ylamino)-N-(4-chlorophenyl)benzamide**  
**(8h)**

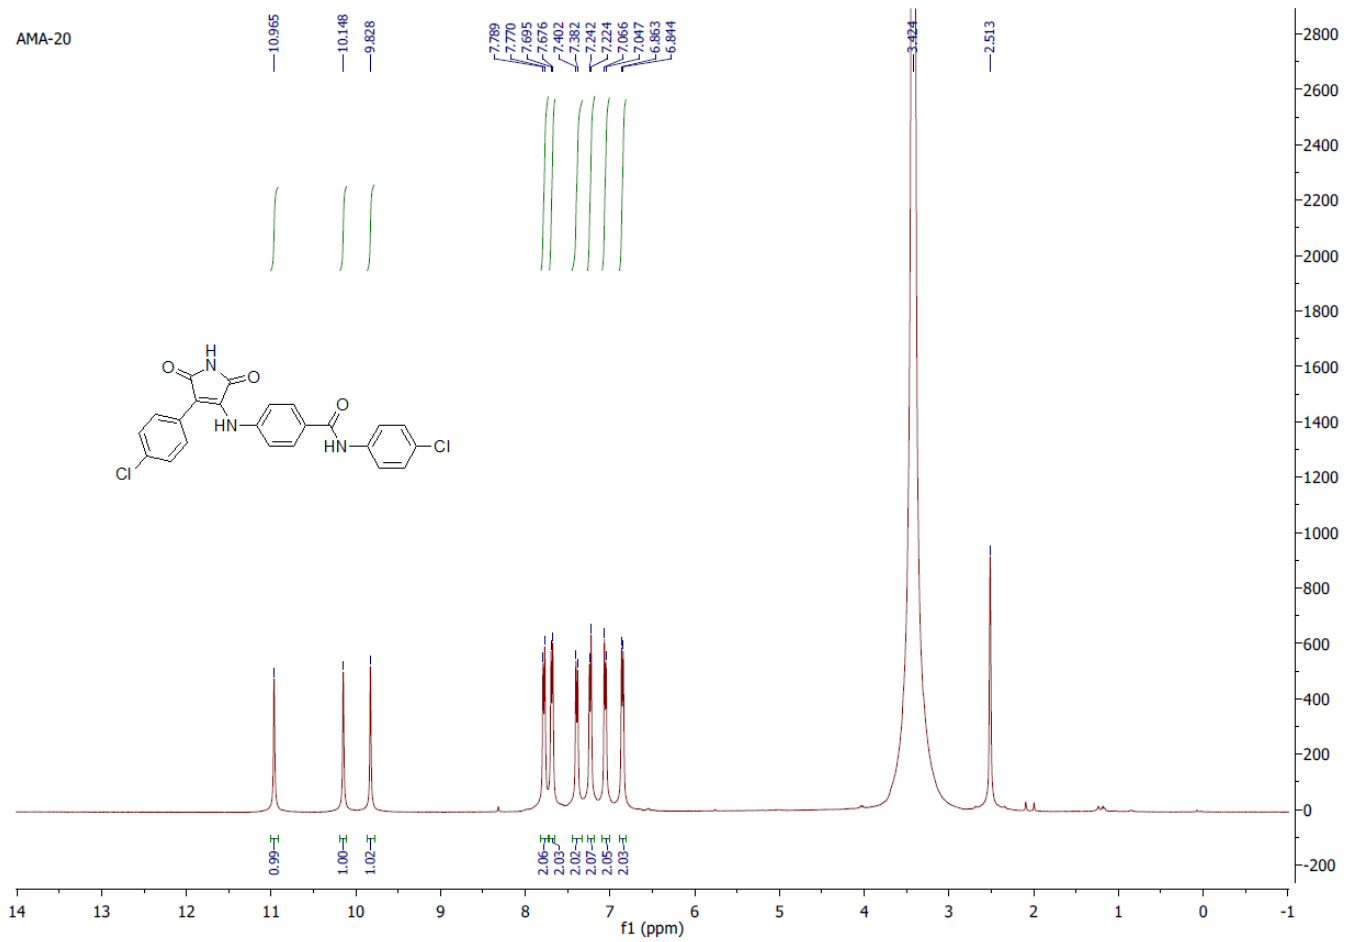

**Proton NMR (8h)**

AMA-20

BRUKER  
AVANCE II 400 NMR  
Spectrometer  
SAIF  
Panjab University  
Chandigarh

Current Data Parameters  
NAME Nov13-2014  
EXRNO 600  
PROCNO 1  
  
F2 - Acquisition Parameters  
Date\_ 20141114  
Time\_ 16.33  
INSTRUM spect  
PROBHD 5 mm BBO BB-  
PULPROG zgpg30  
TD 65536  
SOLVENT DMSO  
NS 512  
DS 4  
SWH 29761.904 Hz  
FIDRES 0.454131 Hz  
AQ 1.1010548 sec  
RG 36  
DW 16.800 usec  
DE 6.00 usec  
TE 294.0 K  
D1 2.00000000 sec  
d11 0.03000000 sec  
DELTA 1.89999998 sec  
TDO 1

===== CHANNEL f1 =====  
NUC1 13C  
P1 9.60 usec  
PL1 -2.00 dB  
SFO1 100.6228298 MHz

===== CHANNEL f2 =====  
CPDPRG2 waltz16  
NUC2 1H  
PCPD2 80.00 usec  
PL2 -3.00 dB  
PL12 14.31 dB  
PL13 18.00 dB  
SFO2 400.1316005 MHz

F2 - Processing parameters  
SI 32768  
SF 100.6128193 MHz  
WDW EM  
SSB 0  
LB 1.00 Hz  
GB 0  
PC 1.40

avtar saifpu@yahoo.co.in

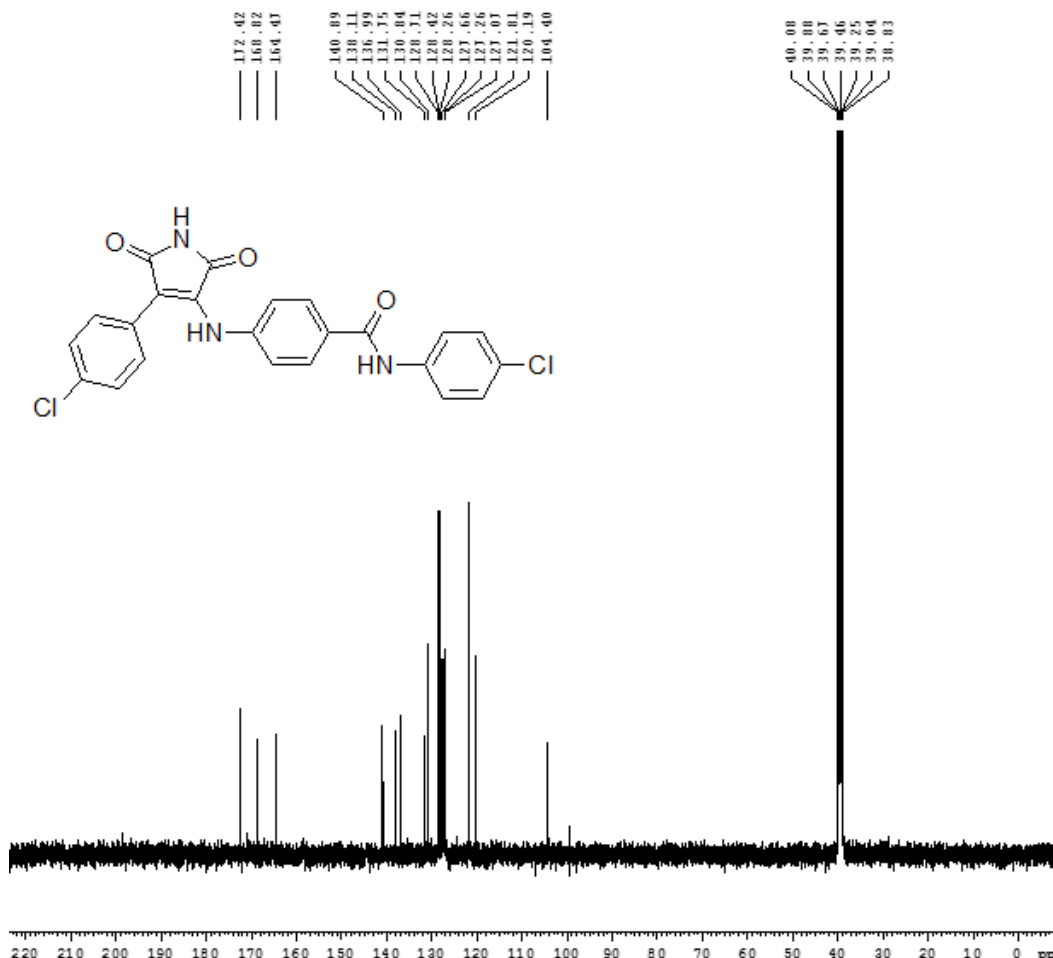

C-13 NMR (8h)

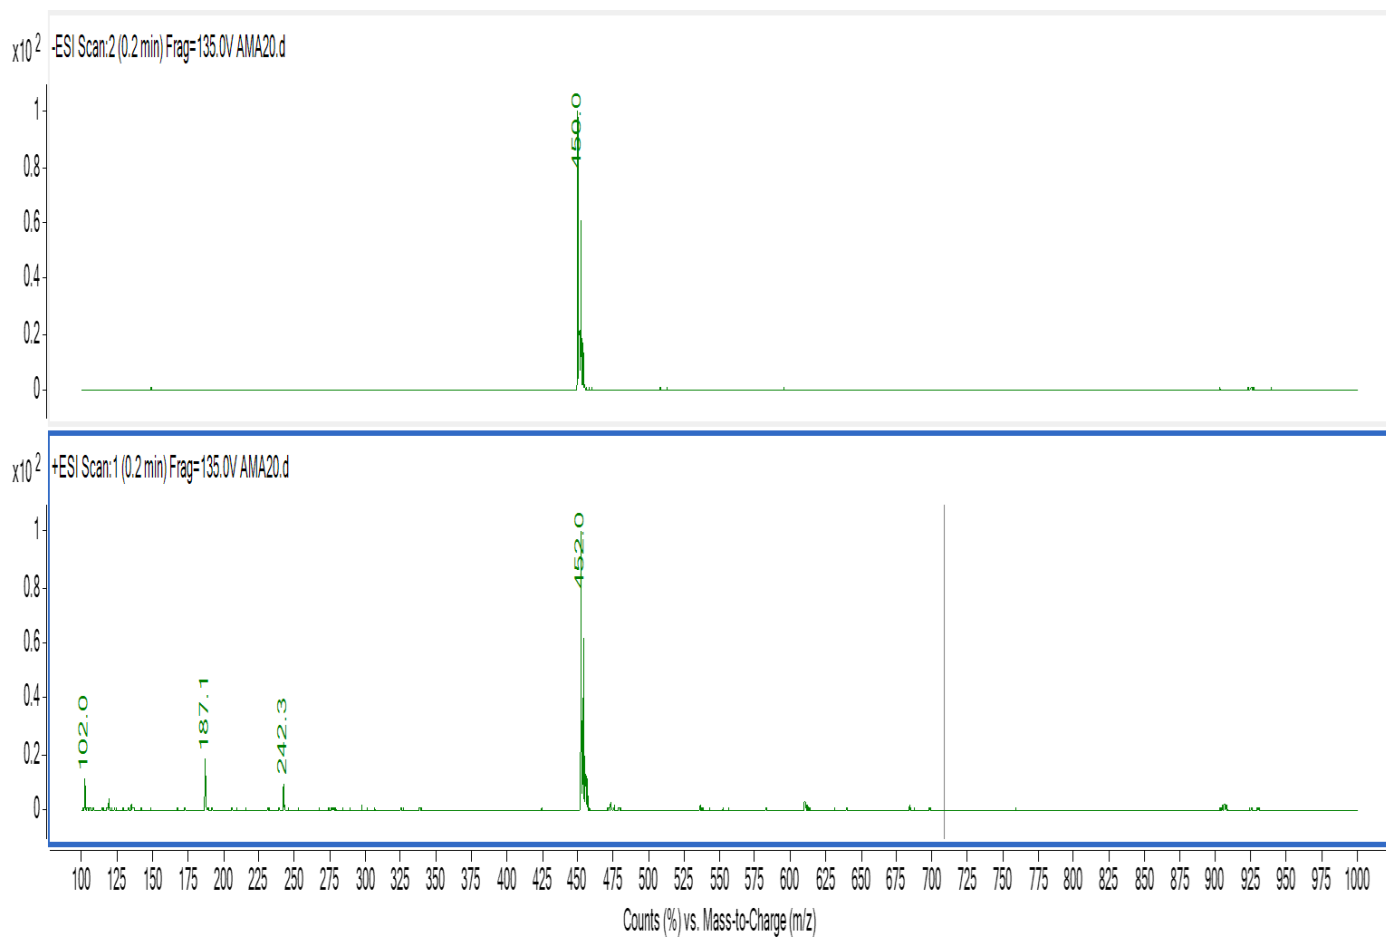

**ESI-MS (8h)**

**4-(2,5-dihydro-4-(4-methoxyphenyl)-2,5-dioxo-1H-pyrrol-3-ylamino)-N-(4-methoxyphenyl)benzamide**  
**(8j)**

AMA-22

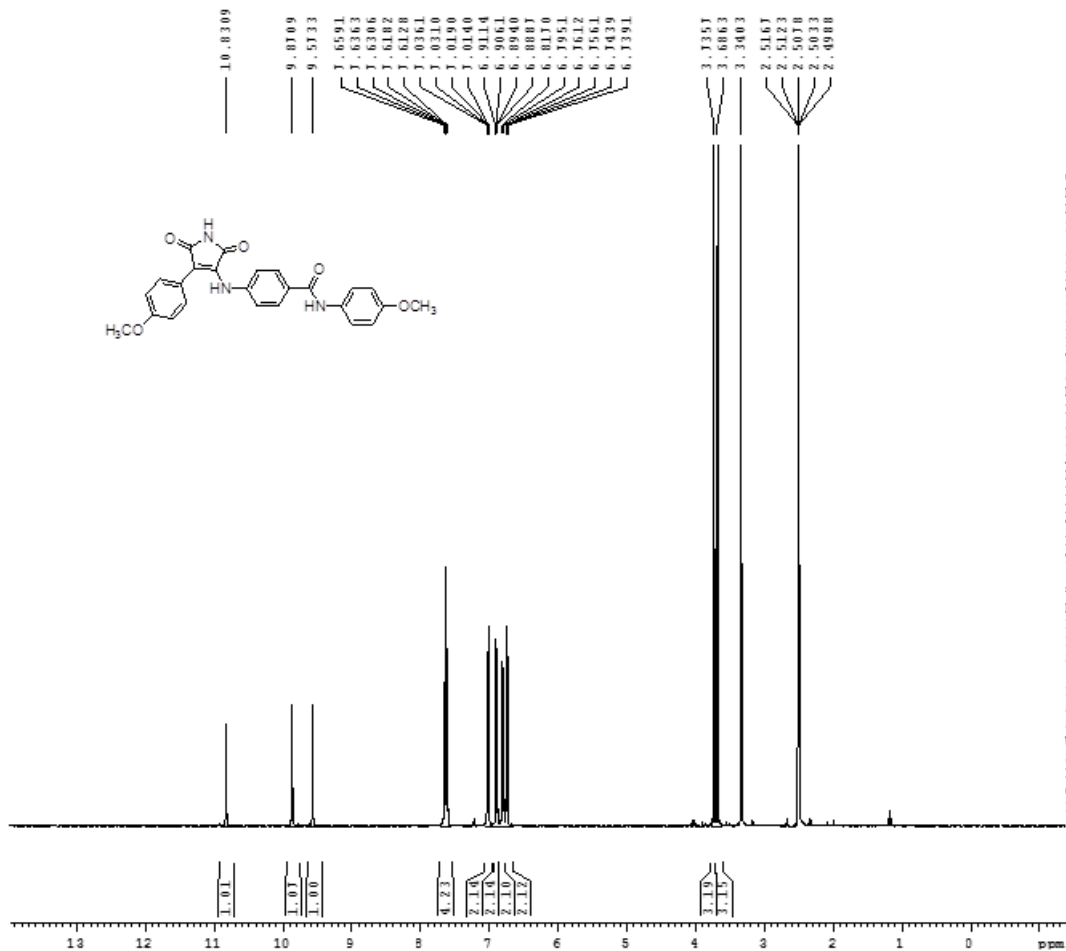

BRUKER  
 AVANCE II 400 NMR  
 Spectrometer  
 SAIF  
 Panjab University  
 Chandigarh

Current Data Parameters  
 NAME May15-2015  
 EXPNO 430  
 PROCNO 1

F2 - Acquisition Parameters  
 Date\_ 20150515  
 Time 17.51  
 INSTRUM spect  
 PROBHD 5 mm PABBO BB-  
 PULPROG zg30  
 TD 65536  
 SOLVENT DMSO  
 NS 8  
 DS 2  
 SWH 12019.230 Hz  
 FIDRES 0.183399 Hz  
 AQ 2.7263477 sec  
 RG 812  
 DW 41.600 usec  
 DE 6.00 usec  
 TE 295.5 K  
 D1 1.0000000 sec  
 TDO 1

===== CHANNEL f1 =====  
 NUC1 1H  
 P1 10.90 usec  
 PL1 -3.00 dB  
 SFO1 400.1324710 MHz

F2 - Processing parameters  
 SI 32768  
 SF 400.1300000 MHz  
 WDW EM  
 SSB 0  
 LB 0.30 Hz  
 GB 0  
 PC 1.00

avtar saifpu@yahoo.co.in

**Proton NMR (8j)**



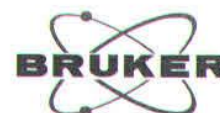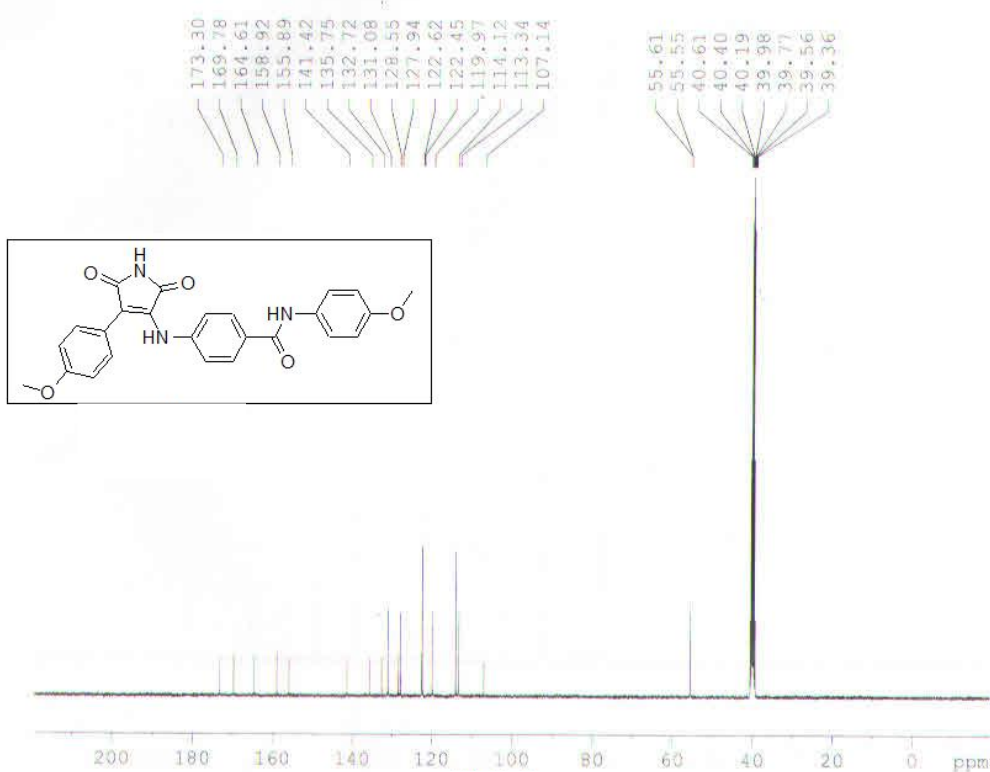

```

===== CHANNEL f1 =====
NAME: 13C NMR MUSHTAQ AT
PROCNO: 1
F2 - Acquisition Parameters
Date_: 20120506
Time: 11:55
PROBHD: 5 mm BBO 51-1H
PULPROG: zgpg30
TE: 300.2
SFO: 125.76
AQ: 0.04
RG: 655
WDW: EM
SSB: 0
GB: 0
PC: 1.00
===== CHANNEL f2 =====
NAME:
PROCNO:
F2 - Processing parameters
SI: 32768
SF: 125.7612500 MHz
WDW: EM
SSB: 0
GB: 0
PC: 1.00
    
```

C-13 NMR (8j)

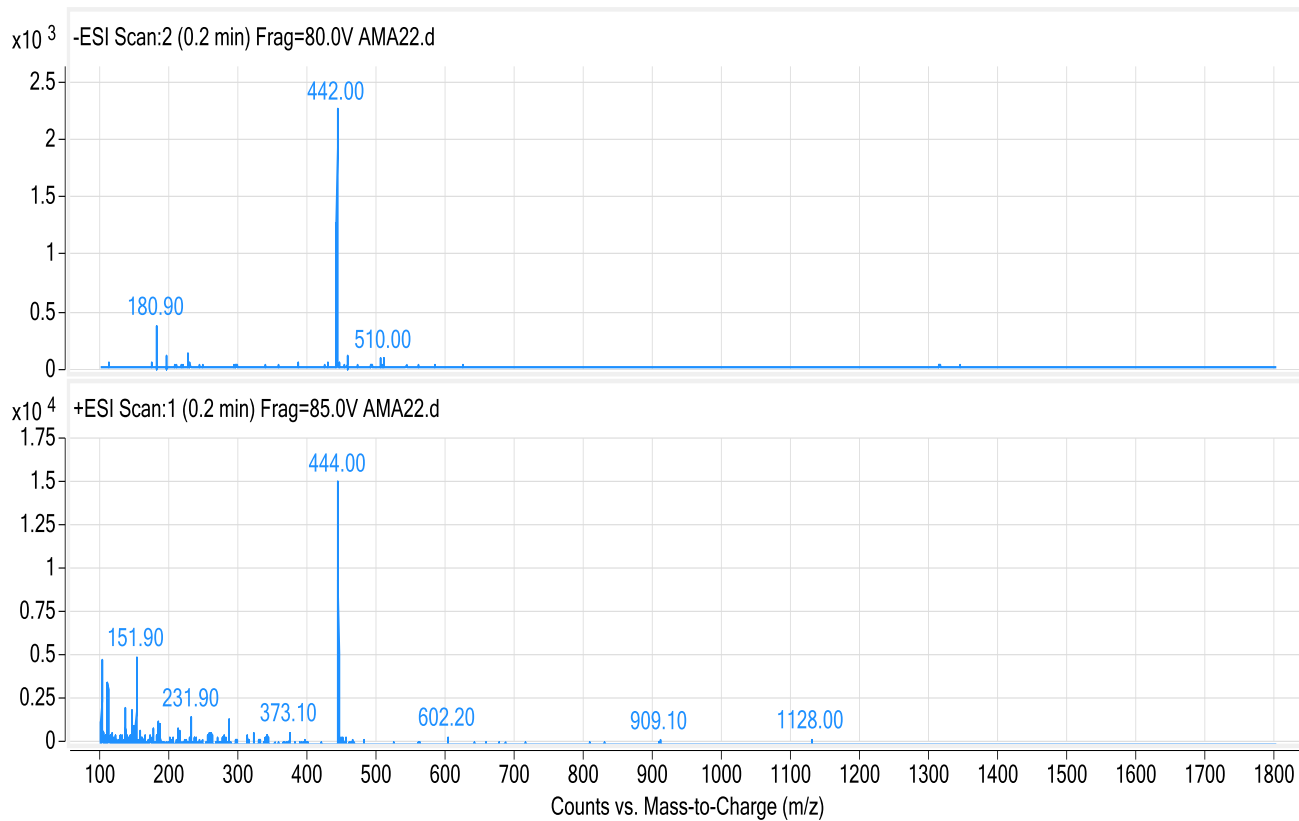

**ESI-MS (8j)**

4-(2,5-dihydro-4-(4-methoxyphenyl)-2,5-dioxo-1H-pyrrol-3-ylamino)-N-(4-chlorophenyl)benzamide

(81)

AMA-24

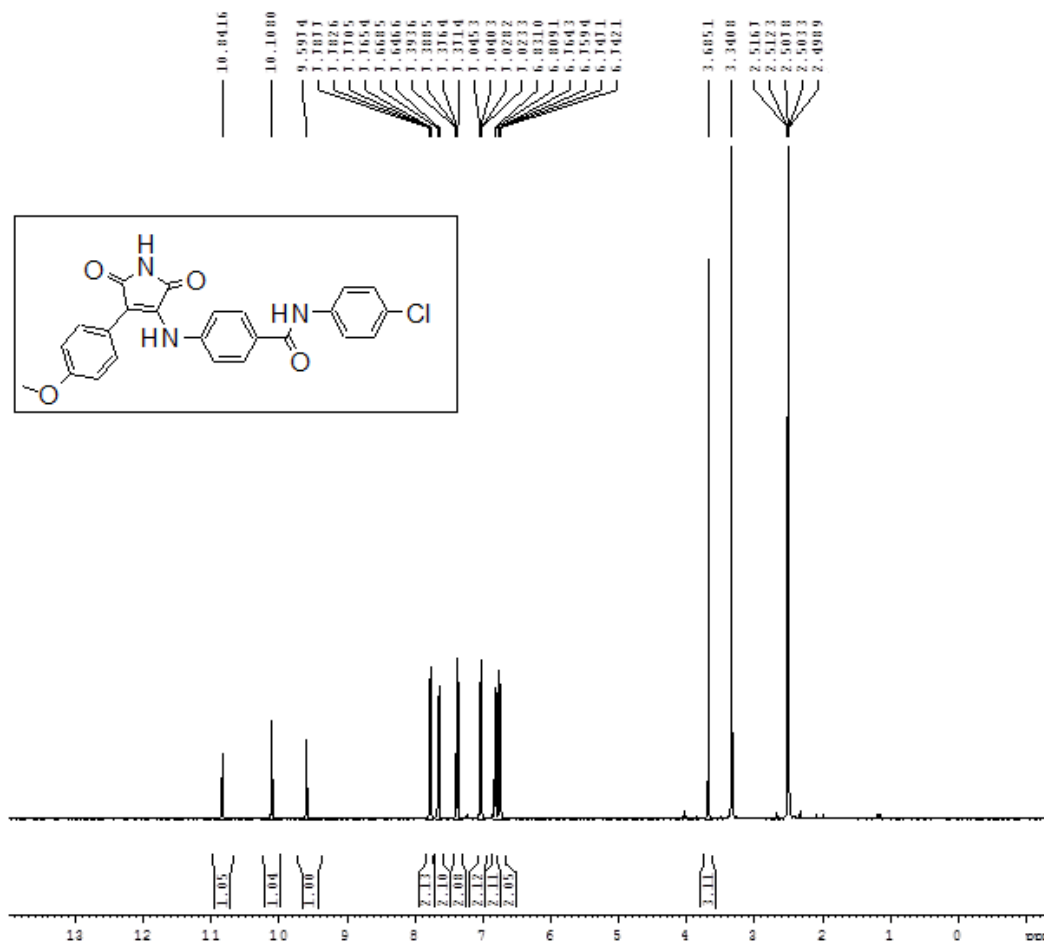

BRUKER  
AVANCE II 400 NMR  
Spectrometer  
SAIF  
Panjab University  
Chandigarh

Current Data Parameters  
NAME May15-2015  
EXPMO 450  
PROCNO 1

F2 - Acquisition Parameters  
Date\_ 20150515  
Time 18.01  
INSTRUM spect  
PROBHD 5 mm PABBO BB-  
PULPROG zgpg30  
TD 65536  
SOLVENT DMSO  
NS 8  
DS 2  
SWH 12019.230 Hz  
FIDRES 0.183399 Hz  
AQ 2.7263477 sec  
RG 812  
DW 41.600 usec  
DE 6.00 usec  
TE 295.5 K  
D1 1.00000000 sec  
TD0 1

==== CHANNEL f1 =====  
NUC1 1H  
P1 10.90 usec  
PL1 -3.00 dB  
SFO1 400.1324710 MHz

F2 - Processing parameters  
SI 32768  
SF 400.1300000 MHz  
WDW EM  
SSB 0  
LB 0.30 Hz  
GB 0  
PC 1.00

avtar saifpu@yahoo.co.in

Proton NMR (81)

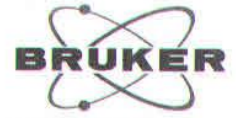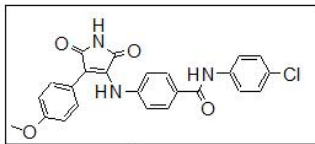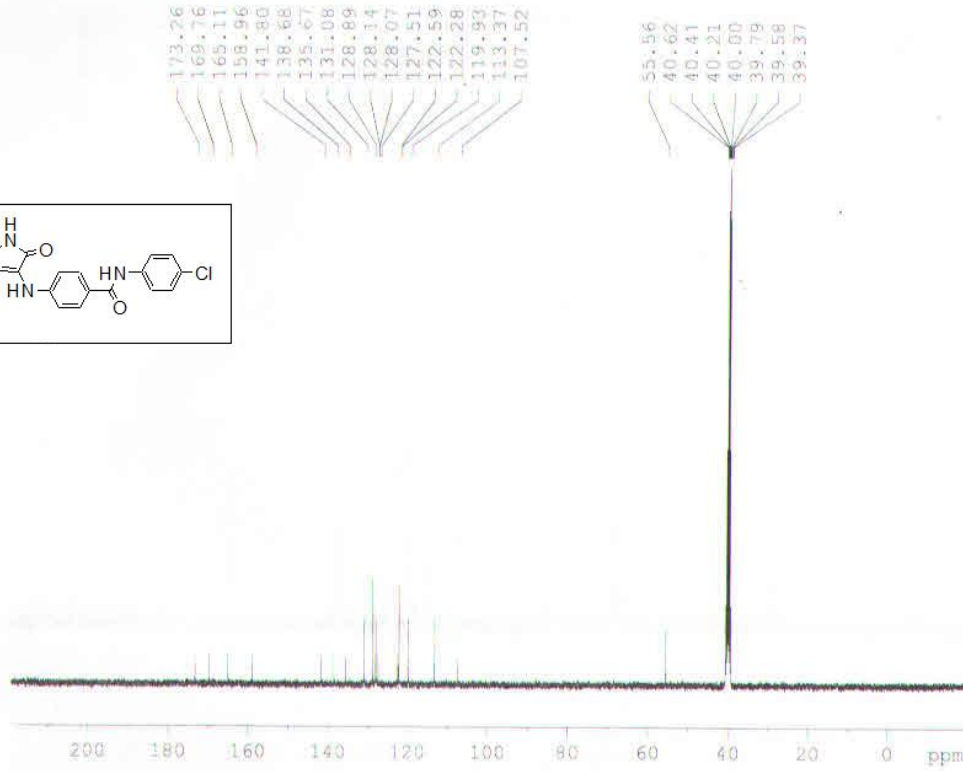

Source: Data: 20120502  
NAME: JH\_SNS\_MUSHTAQ\_AT\_AYA\_24  
EXPNO: 1

===== Acquisition Parameters =====  
Date\_ 20120502  
Time 15:44  
INSTRUM spect  
PROBHD 5 mm BBO BP-1H  
PULPROG zgpg30  
PC 39936  
SFO 400.146  
AQ 0.350  
RG 384  
SD 4  
SI 2400.461 Hz  
FIDRES 2.766728 Hz  
AQ 0.3631900 sec  
RG 384  
TM 20.400 sec  
TE 300.2 K  
DT 250.1 Hz  
QT 2.0000000 sec  
SFO 400.1460000 MHz  
NUC1 13C  
NUC2 13C  
P1 1.00 sec  
PC 1.00 sec

===== CHANNEL f1 =====  
NUC1 13C  
P1 1.00 sec  
PC 1.00 sec  
SFO 100.628380 MHz

===== CHANNEL f2 =====  
NAME waftz2  
P1 1.00  
PC 1.00  
SFO 400.146000 MHz

===== PROCESSING PARAMETERS =====  
SI 2400.461  
SF 400.146000 MHz  
WDW EM  
SSB 0  
GB 0  
PC 1.00 sec  
CD 0  
SD 4

C-13 (81)

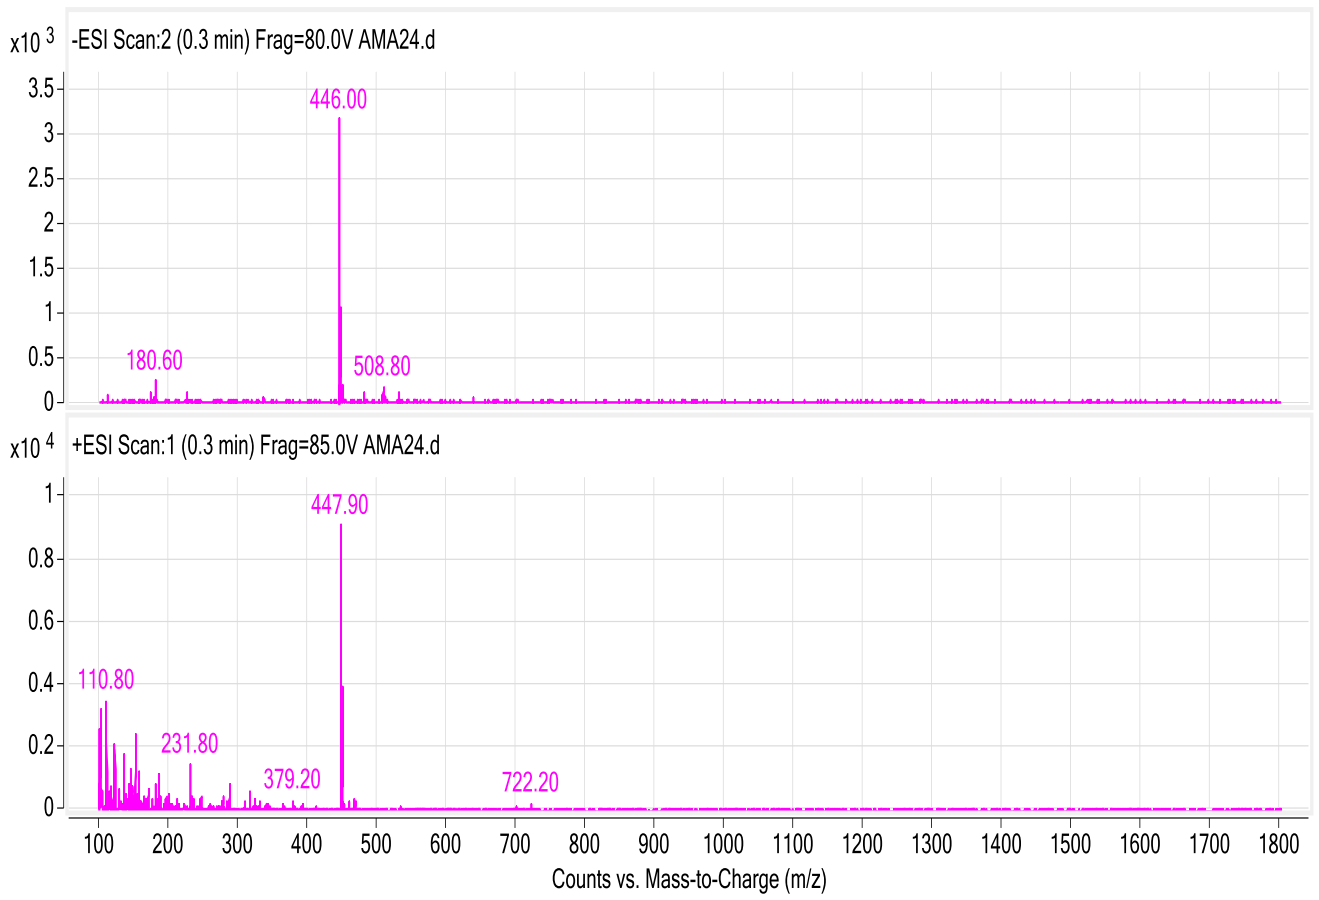

**ESI-MS (81)**

**4-(2,5-dihydro-4-(4-nitrophenyl)-2,5-dioxo-1H-pyrrol-3-ylamino)-N-phenylbenzamide (8m)**

AMA-25

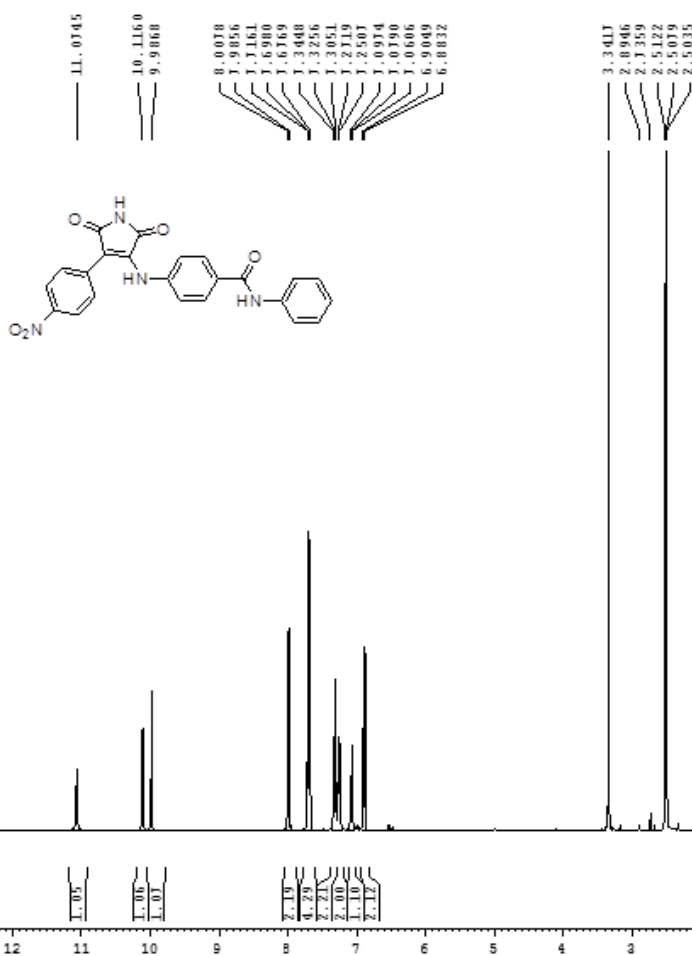

BRUKER  
 AVANCE II 400 NMR  
 Spectrometer  
 SAIF  
 Panjab University  
 Chandigarh

Current Data Parameters  
 NAME May15-2015  
 EXPNO 460  
 PROCNO 1

F2 - Acquisition Parameters  
 Date\_ 20150515  
 Time 18.06  
 INSTRUM spect  
 PROBHD 5 mm PABBO BB-  
 PULPROG zg30  
 TD 65536  
 SOLVENT DMSO  
 NS 8  
 DS 2  
 SWH 12019.230 Hz  
 FIDRES 0.183399 Hz  
 AQ 2.7263477 sec  
 RG 362  
 DW 41.600 usec  
 DE 6.00 usec  
 TE 295.5 K  
 D1 1.00000000 sec  
 TDO 1

===== CHANNEL f1 =====  
 NUC1 1H  
 P1 10.90 usec  
 PL1 -3.00 dB  
 SFO1 400.1324710 MHz

F2 - Processing parameters  
 SI 32768  
 SF 400.1300000 MHz  
 WDW EM  
 SSB 0  
 LB 0.30 Hz  
 GB 0  
 PC 1.00

avtar saifpu@yahoo.co.in

**Proton NMR (8m)**

JH SNS MUSHTAQ AT AMA 25

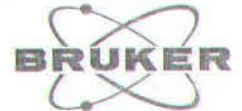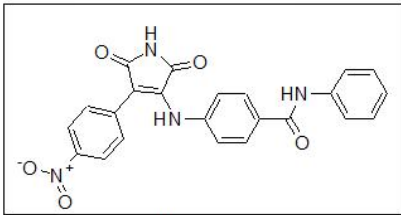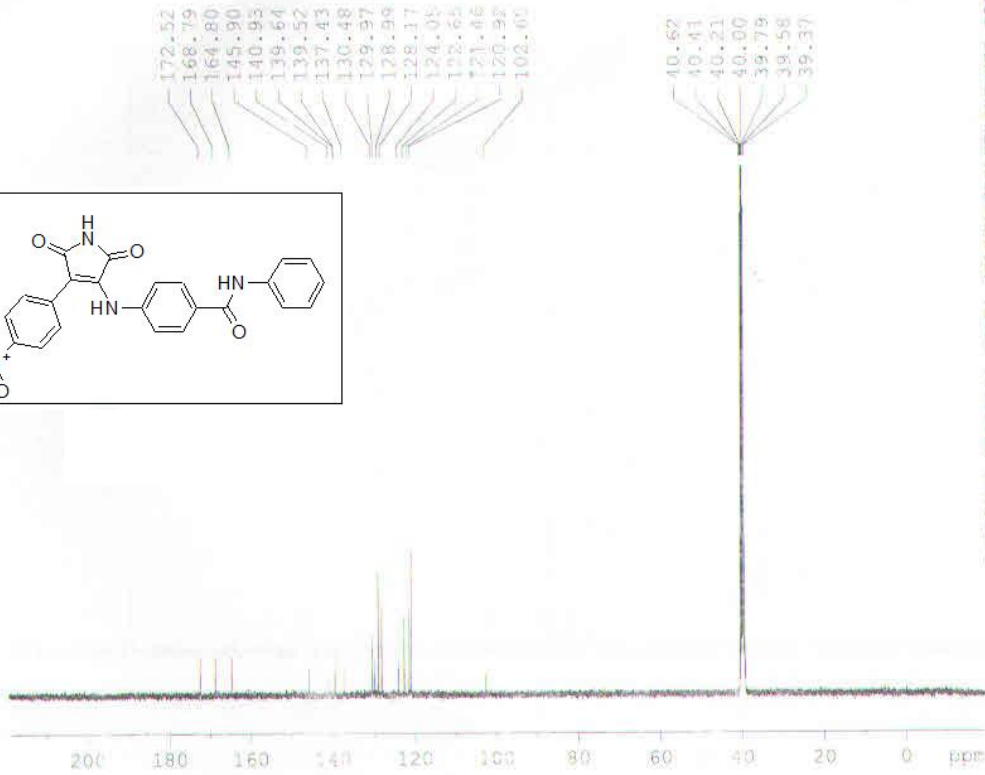

```
=====
Experiment: 13C NMR
Date_: 01/05/2015
Time_: 11:37
INSTRUM: spect
PROBHD: 5 mm BBO-EBB-1H
PULPROG: zgpg30
TD: 65536
SFO: 125.761
AQ: 0.500
RG: 1024
AQ2: 0.010
SFO2: 400.141
PC: 1.00
=====
F2 - Acquisition Parameters
Date_: 01/05/2015
Time_: 11:37
INSTRUM: spect
PROBHD: 5 mm BBO-EBB-1H
PULPROG: zgpg30
TD: 65536
SFO: 125.761
AQ: 0.500
RG: 1024
AQ2: 0.010
SFO2: 400.141
PC: 1.00
=====
F2 - Processing parameters
SI: 32768
SF: 125.761
WDW: EM
SSB: 0
GB: 0
PC: 1.00
SC: 32768
SF2: 400.141
WDW2: EM
SSB2: 0
GB2: 0
PC2: 1.00
=====
F2 - Reference parameters
SI: 32768
SF: 125.761
WDW: EM
SSB: 0
GB: 0
PC: 1.00
SC: 32768
SF2: 400.141
WDW2: EM
SSB2: 0
GB2: 0
PC2: 1.00
=====
```

C-13 (8m)

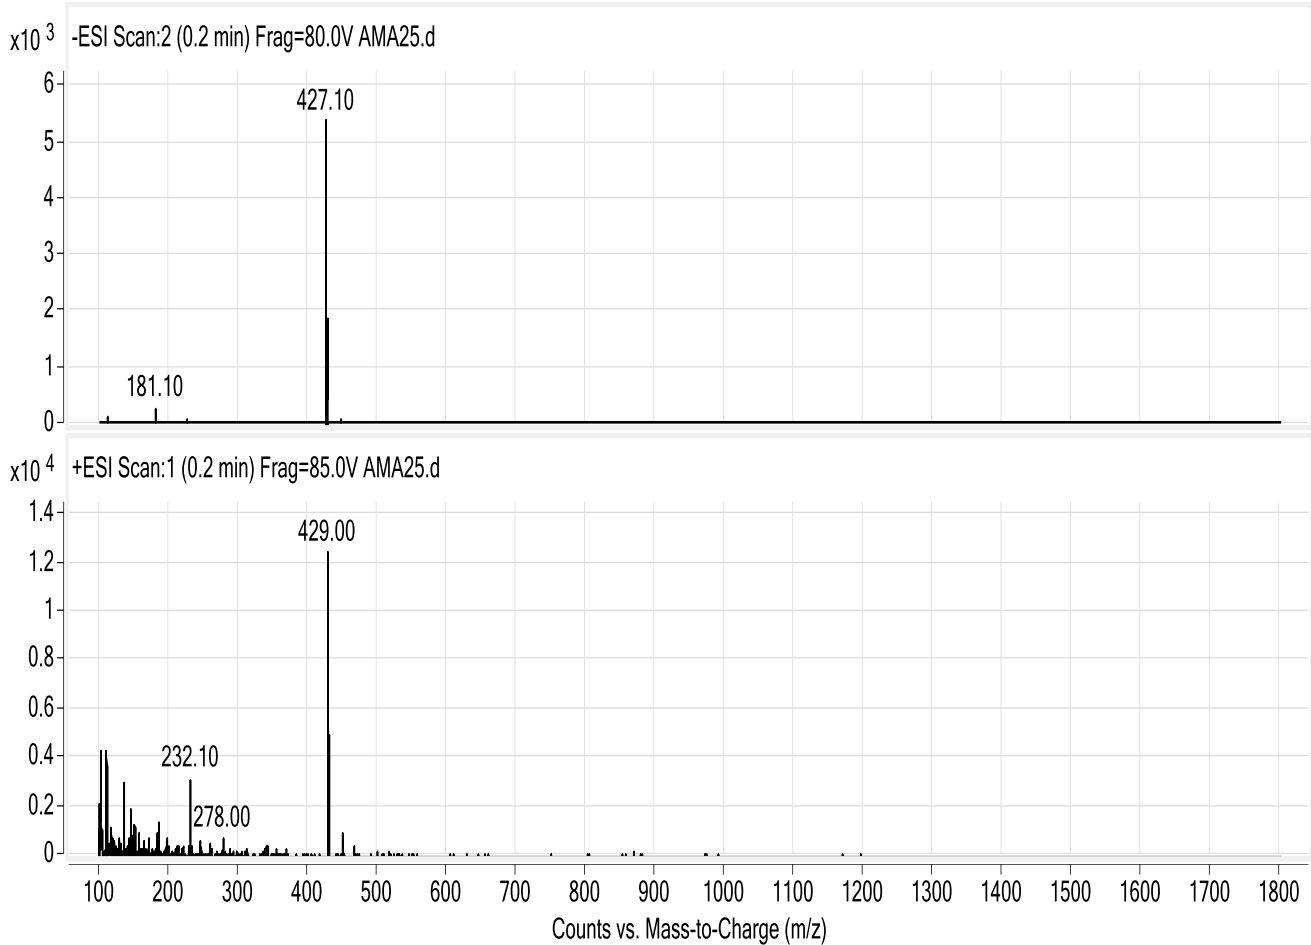

**ESI-MS (8m)**



**4-(2,5-dihydro-4-(4-nitrophenyl)-2,5-dioxo-1H-pyrrol-3-ylamino)-N-(4-methoxyphenyl)benzamide**  
**(8n)**

AMA-26

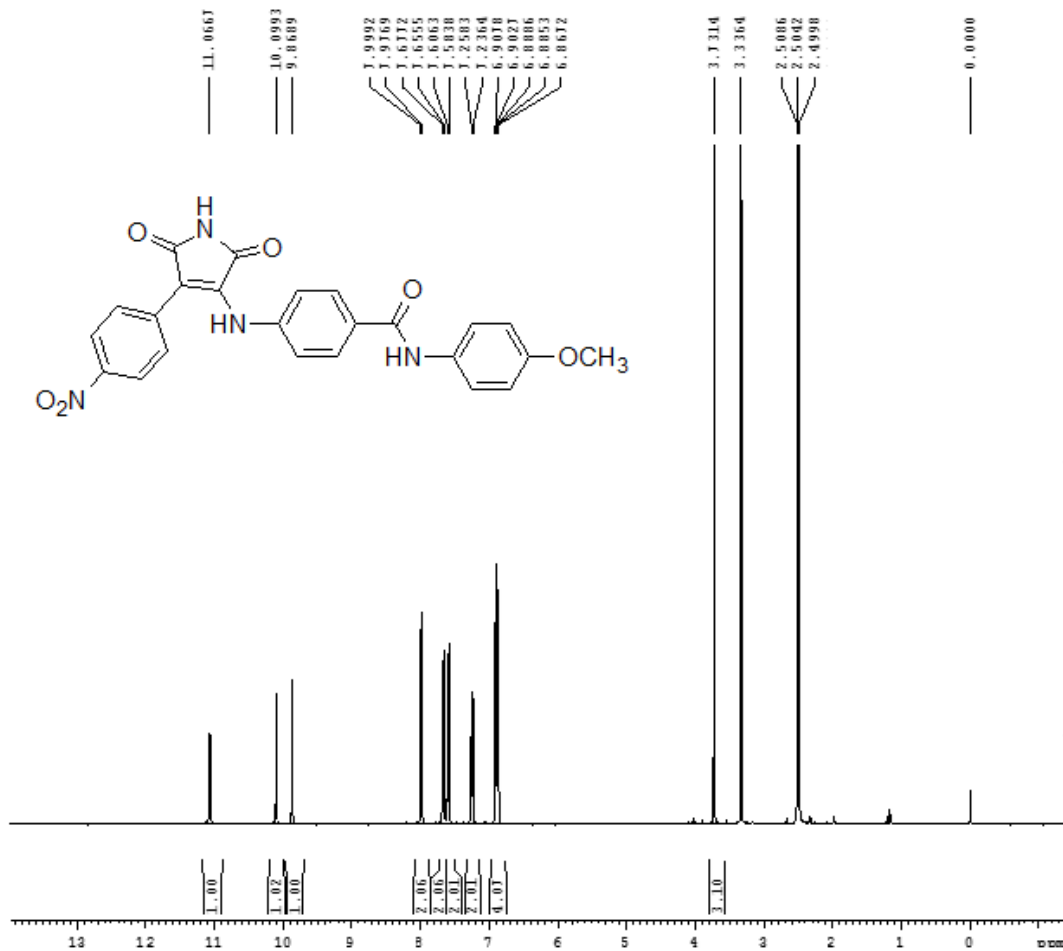

BRUKER  
 AVANCE II 400 NMR  
 Spectrometer  
 SAIF  
 Panjab University  
 Chandigarh

Current Data Parameters  
 NAME May15-2015  
 EXPNO 470  
 PROCNO 1

F2 - Acquisition Parameters  
 Date\_ 20150515  
 Time 18.11  
 INSTRUM spect  
 PROBHD 5 mm PABBO BB-  
 PULPROG zg30  
 TD 65536  
 SOLVENT DMSO  
 NS 8  
 DS 2  
 SWH 12019.230 Hz  
 FIDRES 0.183399 Hz  
 AQ 2.7263477 sec  
 RG 812  
 DW 41.600 usec  
 DE 6.00 usec  
 TE 295.6 K  
 D1 1.00000000 sec  
 TDO 1

===== CHANNEL f1 =====  
 NUC1 1H  
 P1 10.90 usec  
 PL1 -3.00 dB  
 SFO1 400.1324710 MHz

F2 - Processing parameters  
 SI 32768  
 SF 400.130015 MHz  
 WDW EM  
 SSB 0  
 LB 0.30 Hz  
 GB 0  
 PC 1.00

**Proton NMR (8n)**

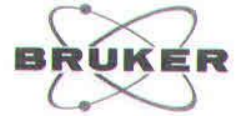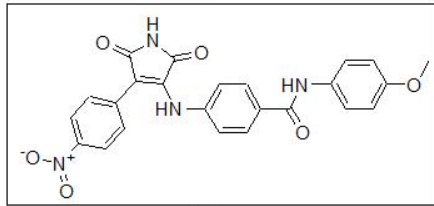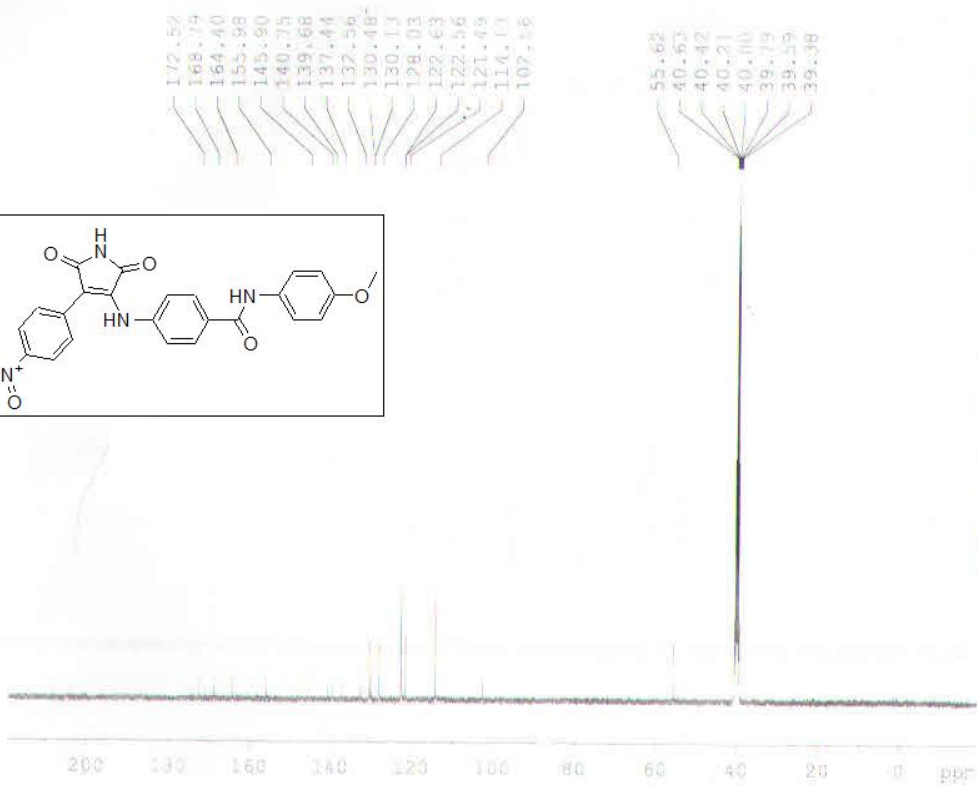

C-13 (8n)

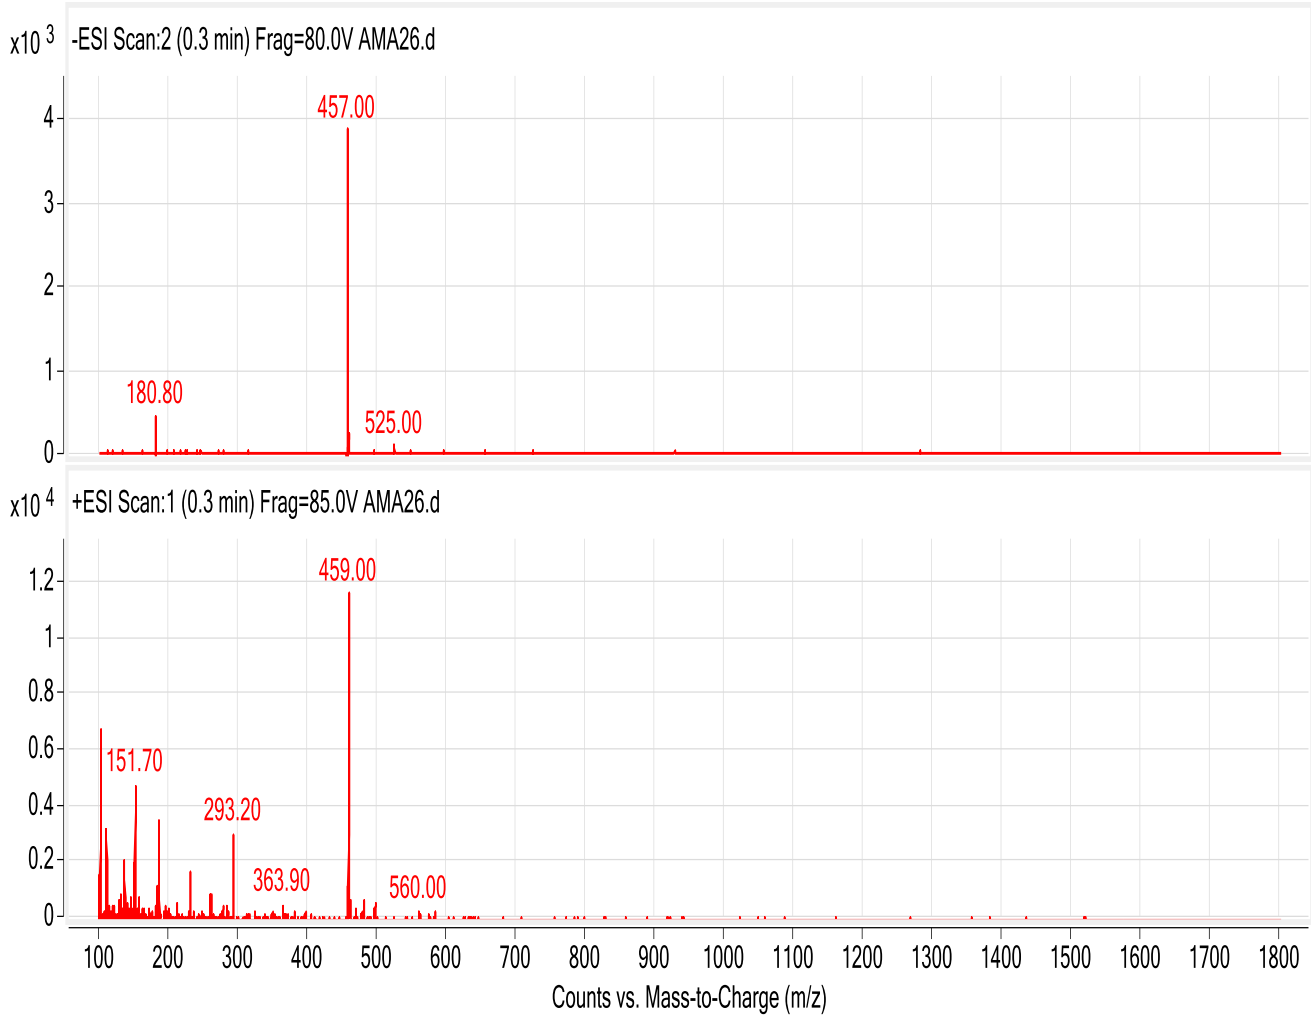

**ESI-MS (8n)**

**4-(2,5-dihydro-2,5-dioxo-4-phenyl-1H-pyrrol-3-ylamino)-N-(4-methoxyphenyl)benzamide (8b)**

AMA-30

BRUKER  
 AVANCE II 400 NMR  
 Spectrometer  
 SAIF  
 Panjab University  
 Chandigarh

Current Data Parameters  
 NAME May15-2015  
 EXPNO 510  
 PROCNO 1

F2 - Acquisition Parameters  
 Date\_ 20150515  
 Time 18.31  
 INSTRUM spect  
 PROBHD 5 mm PABBO BB-  
 PULPROG zg30  
 TD 65536  
 SOLVENT DMSO  
 NS 8  
 DS 2  
 SWH 12019.230 Hz  
 FIDRES 0.183399 Hz  
 AQ 2.7263477 sec  
 RG 456  
 DW 41.600 usec  
 DE 6.00 usec  
 TE 295.7 K  
 D1 1.00000000 sec  
 TD0 1

==== CHANNEL f1 =====  
 NUC1 1H  
 P1 10.90 usec  
 PL1 -3.00 dB  
 SFO1 400.1324710 MHz

F2 - Processing parameters  
 SI 32768  
 SF 400.1300023 MHz  
 WDW EM  
 SSB 0  
 LB 0.30 Hz  
 GB 0  
 PC 1.00

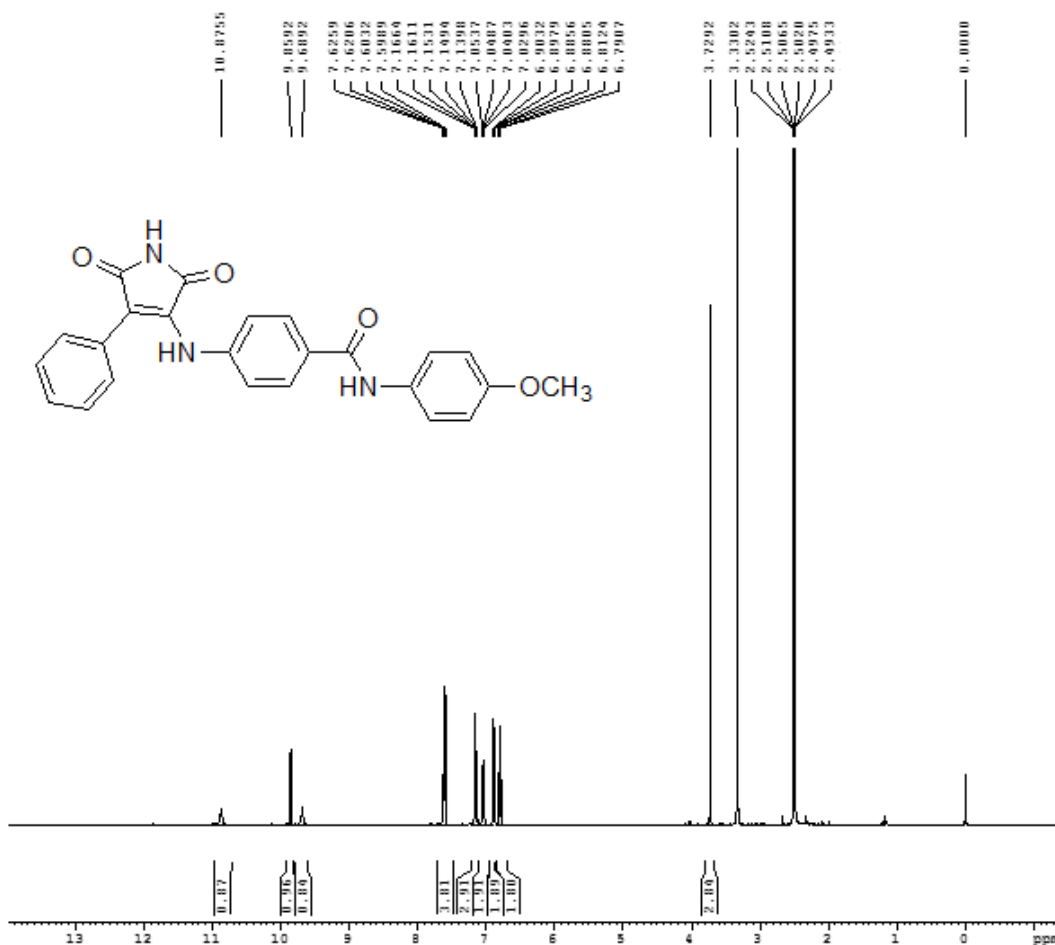

avtar saifpu@yahoo.co.in

**Proton NMR (8b)**

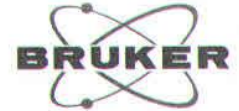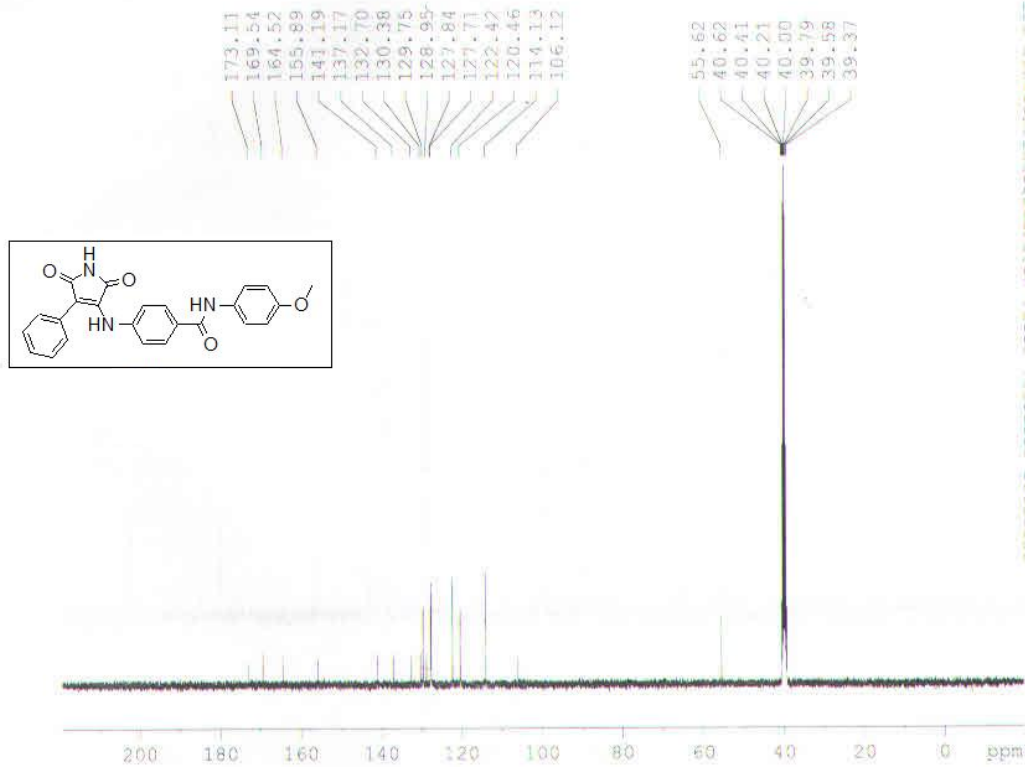

===== DATA PARAMETERS =====  
NAME: JH SNS MUSHTAQ AT AMA 30  
EXPNO: 1  
PROCNO: 1  
F2 - Acquisition Parameters  
Date\_ : 20100601  
Time : 11:22  
INSTRUM : spect  
PROBHD : 5 mm BBO 1H/13  
PULPROG : zgpg30  
TD : 65536  
SOLVENT : DMSO  
NS : 256  
DS : 4  
SWH : 24031.141 Hz  
FIDRES : 0.36638 Hz  
AQ : 1.61198 sec  
RG : 328  
WV : 20.800 MHz  
DE : 6.00 MHz  
TE : 299.2 K  
SI : 0.0000000000000000  
F1 : 101.6253600 MHz  
DELTA : 1.59879584 sec  
FID  
===== CHANNEL f1 =====  
NUC1 : 13C  
PL1 : 0.00 MHz  
PL2 : 12.00 MHz  
SFO1 : 100.6261899 MHz  
===== CHANNEL f2 =====  
CPDPRG2 : zgpg30  
NUC2 : 1H  
PL2 : 0.00 MHz  
PL3 : 0.00 MHz  
PL4 : 18.48 MHz  
PL5 : 20.00 MHz  
SFO2 : 400.1418005 MHz  
F2 - Processing parameters  
SI : 1744  
SF : 100.6261899 MHz  
WDW : EM  
SSB : 0  
GB : 0  
PC : 1.00 Hz  
SC : 1.44

C-13 (8b)

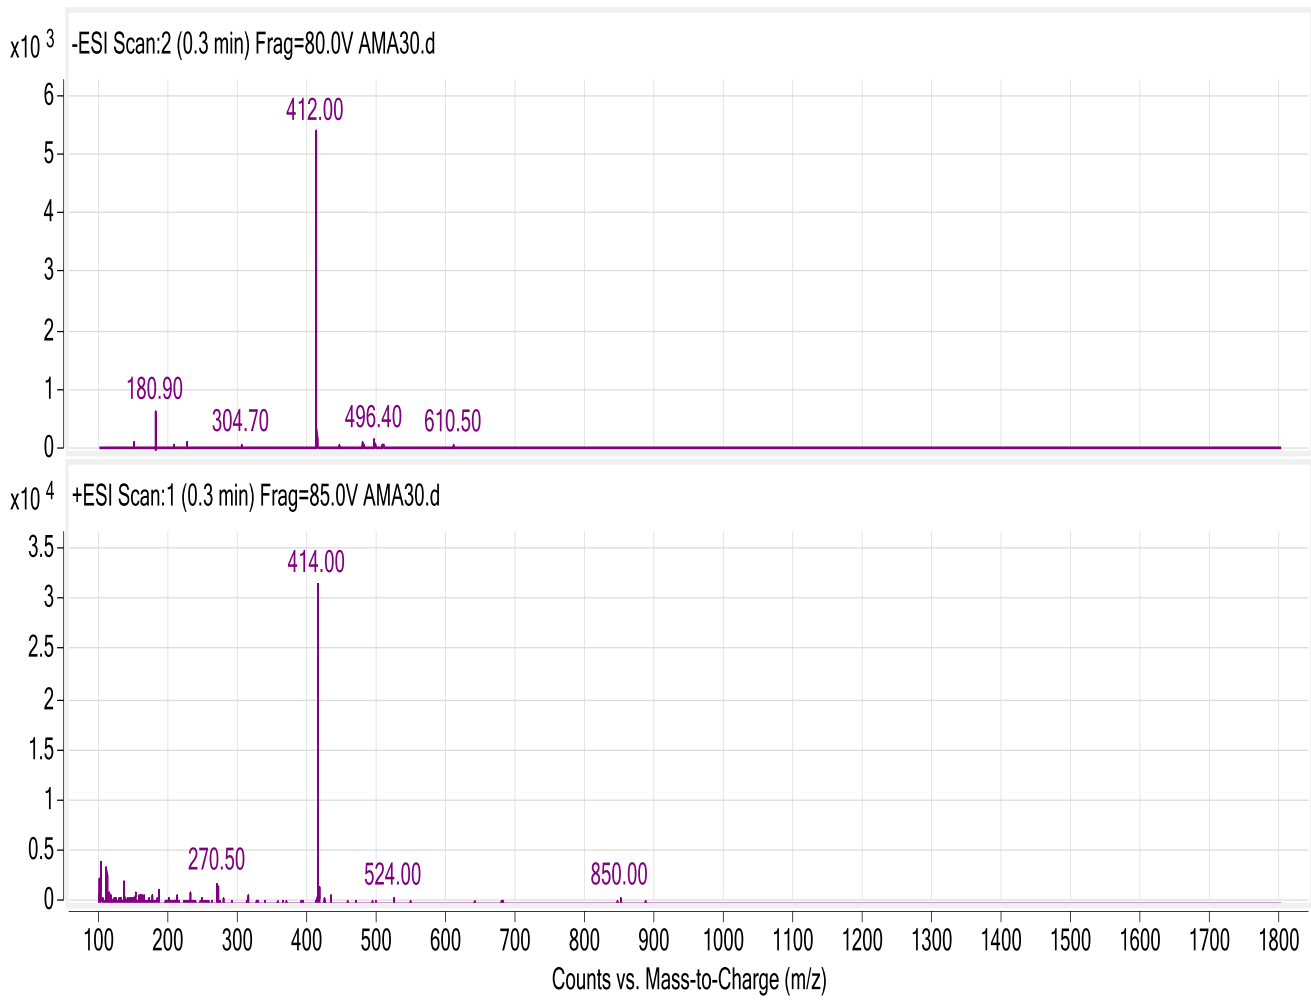

**ESI-MS (8b)**

**4-(2,5-dihydro-2,5-dioxo-4-phenyl-1H-pyrrol-3-ylamino)-N-(4-fluorophenyl)benzamide (8c)**

AMA-31

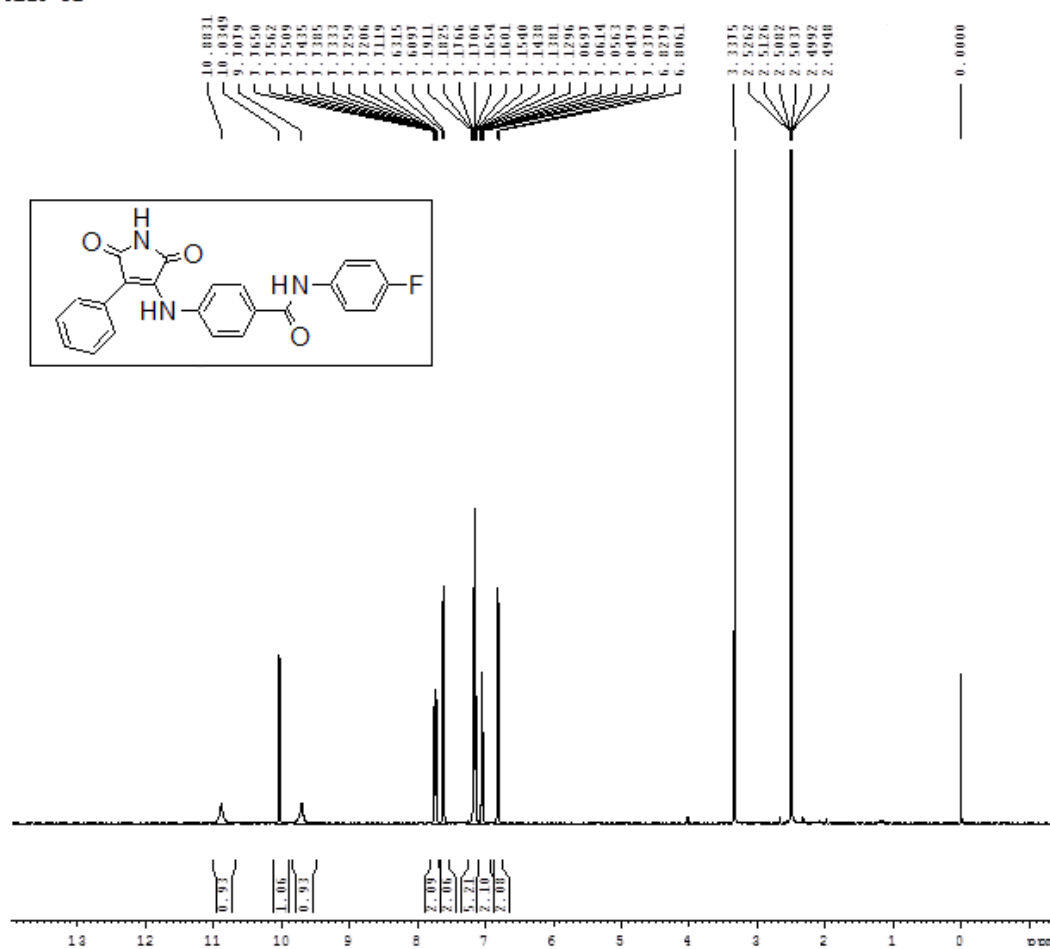

BRUKER  
AVANCE II 400 NMR  
Spectrometer  
SAIF  
Panjab University  
Chandigarh

Current Data Parameters  
NAME May15-2015  
EXPNO 520  
PROCNO 1

F2 - Acquisition Parameters  
Date\_ 20150515  
Time 18.37  
INSTRUM spect  
PROBHD 5 mm PABBO BB-  
PULPROG zg30  
TD 65536  
SOLVENT DMSO  
NS 8  
DS 2  
SWH 12019.230 Hz  
FIDRES 0.182399 Hz  
AQ 2.7262477 sec  
RG 812  
DW 41.600 usec  
DE 6.00 usec  
TE 295.7 K  
D1 1.00000000 sec  
TD0 1

==== CHANNEL f1 =====  
NUC1 1H  
P1 10.90 usec  
PL1 -3.00 dB  
SFO1 400.1324710 MHz

F2 - Processing parameters  
SI 32768  
SF 400.1300017 MHz  
WDW EM  
SSB 0  
LB 0.30 Hz  
GB 0  
PC 1.00

avtar saifpu@yahoo.co.in

**Proton NMR (8c)**

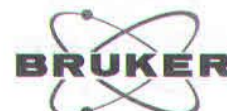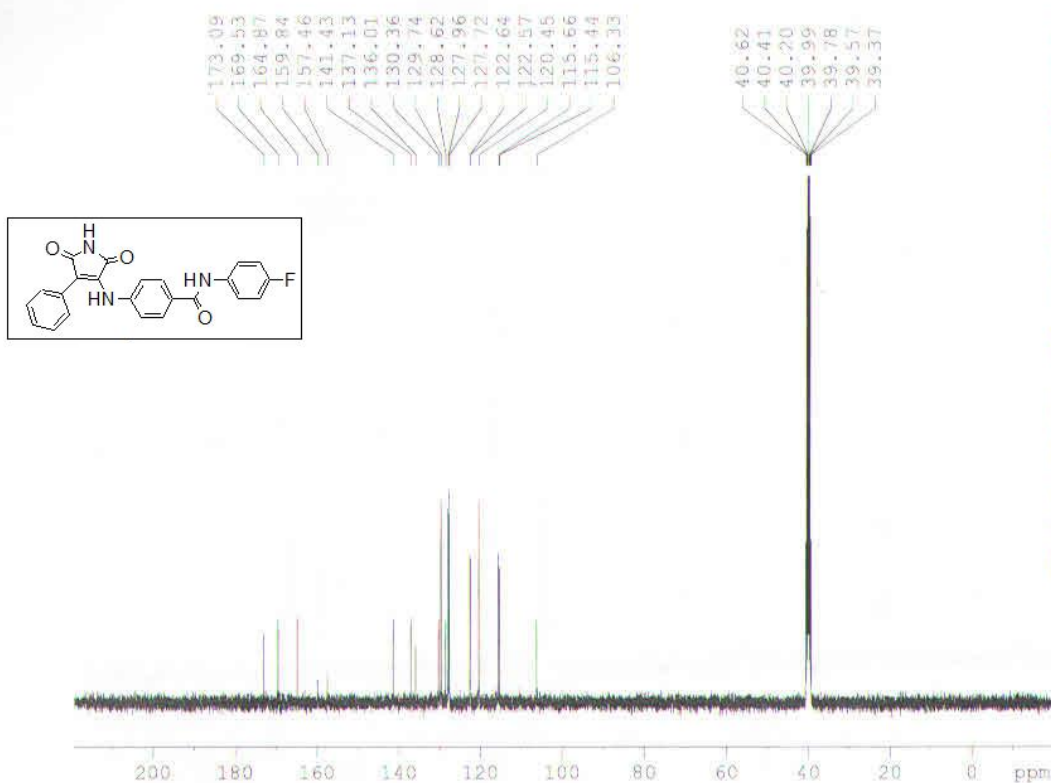

C-13 (8c)



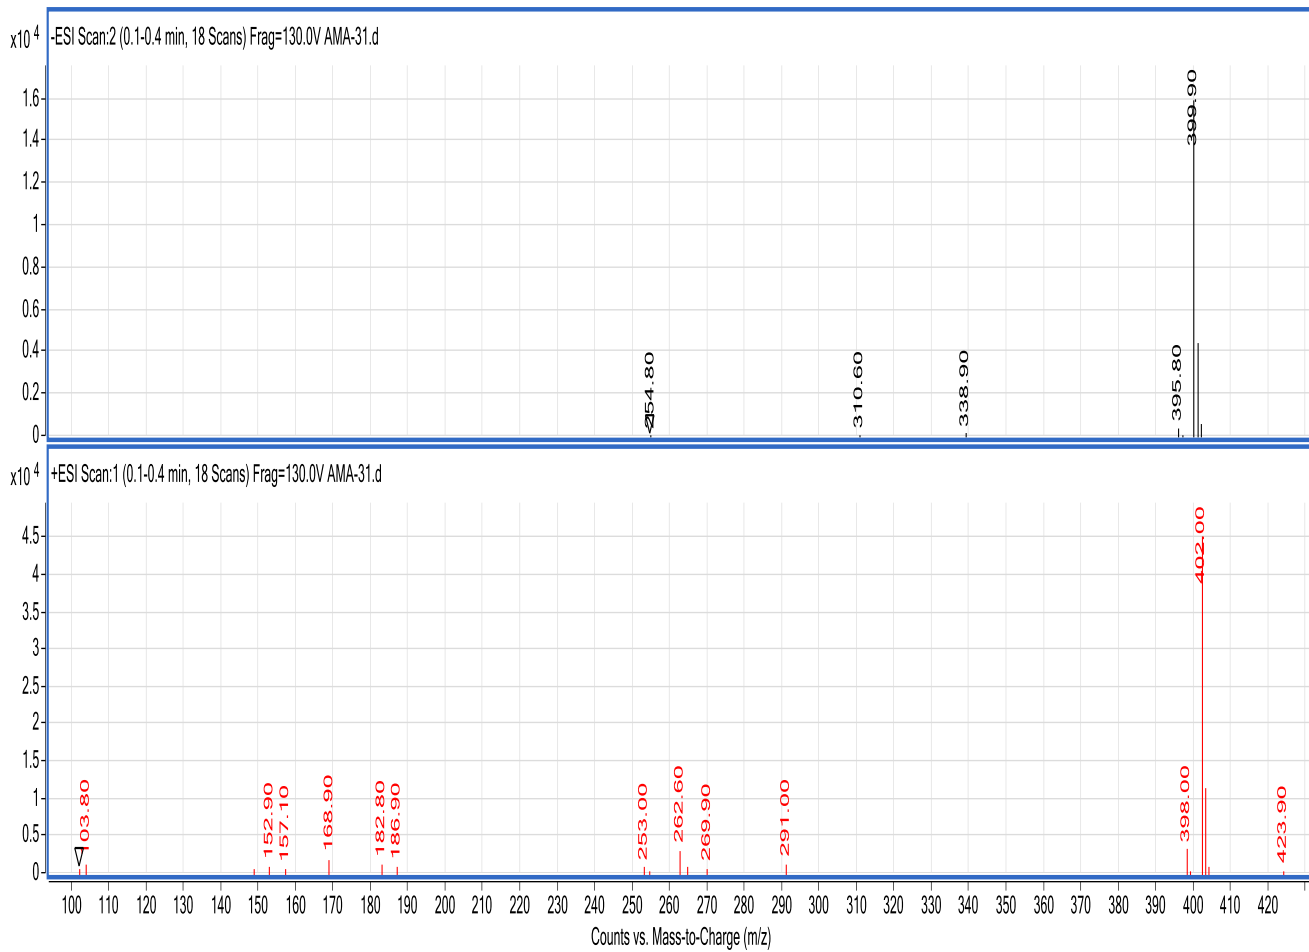

**ESI-MS (8c)**

**4-(2,5-dihydro-2,5-dioxo-4-phenyl-1H-pyrrol-3-ylamino)-N-(4-chlorophenyl)benzamide (8d)**

AMA-32

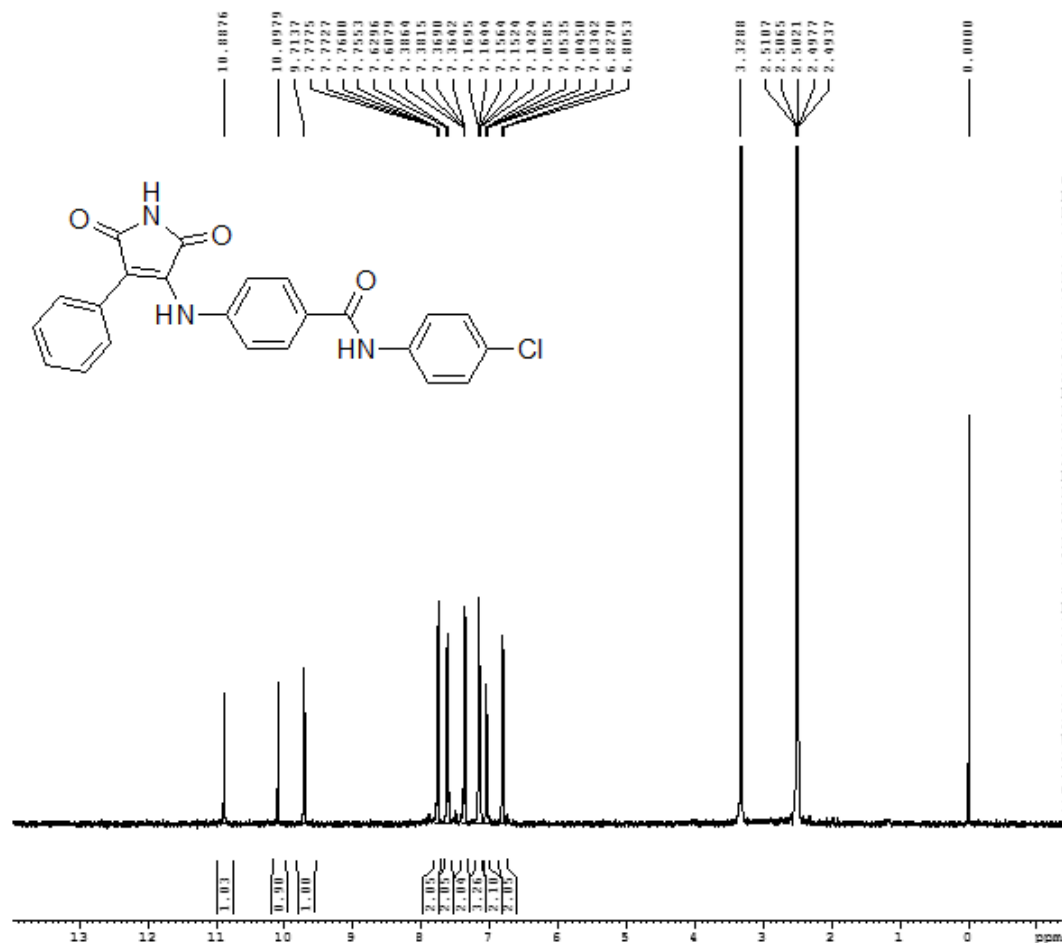

BRUKER  
AVANCE II 400 NMR  
Spectrometer  
SAIF  
Panjab University  
Chandigarh

Current Data Parameters  
NAME May15-2015  
EXPNO 530  
PROCNO 1

F2 - Acquisition Parameters  
Date\_ 20150515  
Time 18.42  
INSTRUM spect  
PROBHD 5 mm PABBO BB-  
PULPROG zg30  
TD 65536  
SOLVENT DMSO  
NS 8  
DS 2  
SWH 12019.230 Hz  
FIDRES 0.183399 Hz  
AQ 2.7263477 sec  
RG 912  
DN 41.600 usec  
DE 6.00 usec  
TE 295.7 K  
D1 1.0000000 sec  
TD0 1

==== CHANNEL f1 =====  
NUC1 1H  
P1 10.90 usec  
PL1 -3.00 dB  
SFO1 400.1324710 MHz  
  
F2 - Processing parameters  
SI 32768  
SF 400.1300024 MHz  
WDW EM  
SSB 0  
LB 0.30 Hz  
GB 0  
PC 1.00

avtar saifpu@yahoo.co.in

**Proton NMR (8d)**

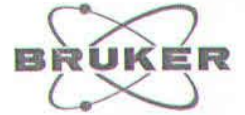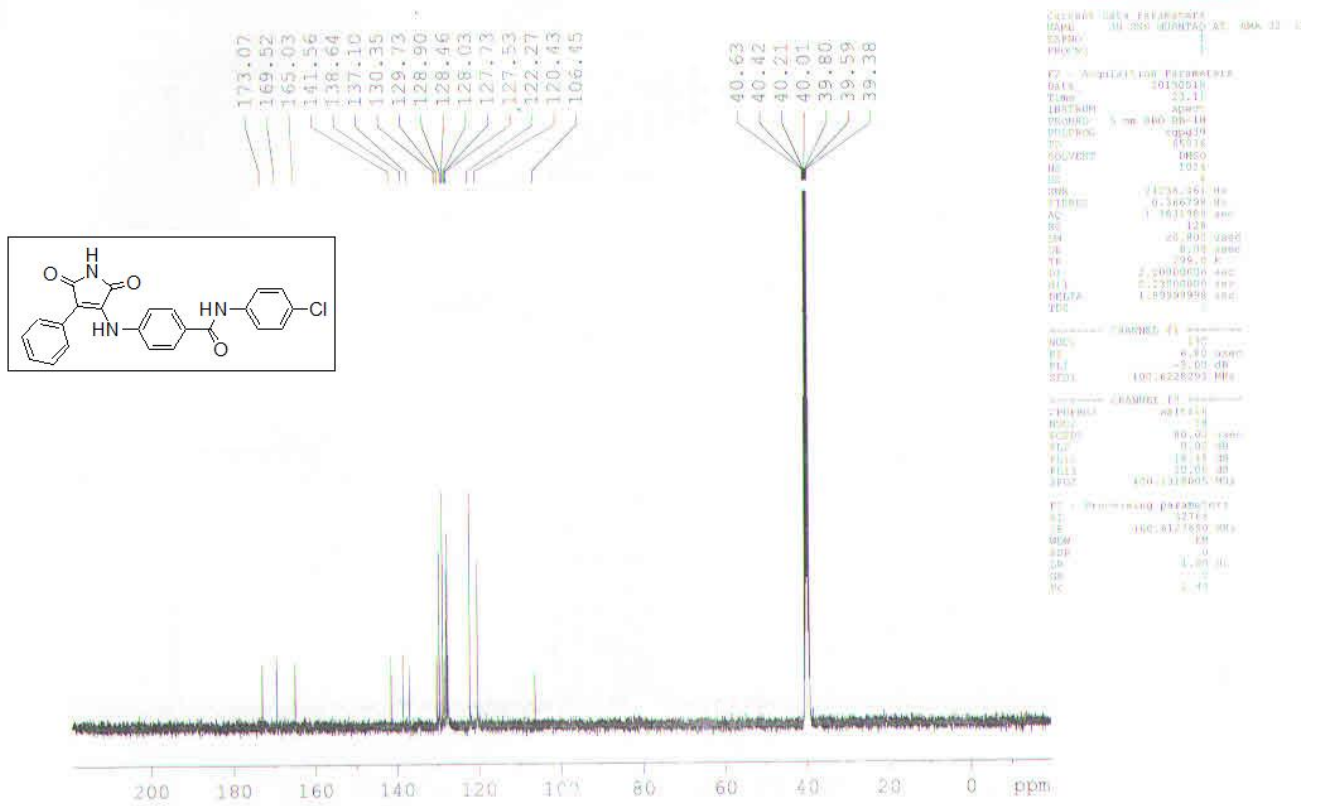

C-13 (8d)

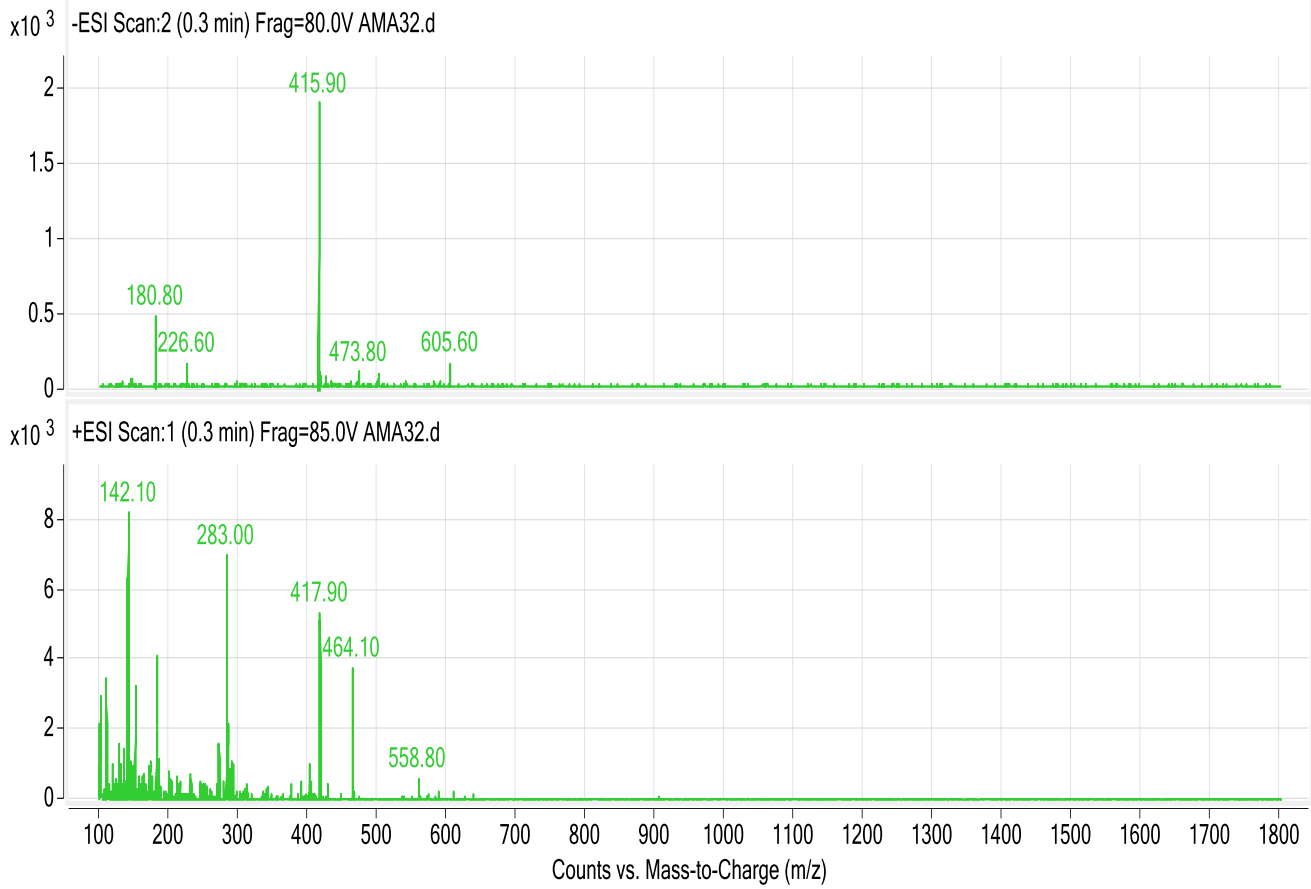

**ESI-MS (8d)**
